# Supplementary material for: Solid-state tunable photoluminescence in gadolinium-organic frameworks: effects of the Eu3+ content and co-doping with Tb3+
Source: Royal Society of Chemistry journal article supplement (doi:10.1039/c7nj04625a), 2018-01-01
Supplement: c7nj04625a1.pdf [file c7nj04625a1.pdf]

## Electronic Supplementary Information

### Solid-state tunable photoluminescence in Gadolinium-Organic Frameworks: effect of the $\text{Eu}^{3+}$ content and co-doping with $\text{Tb}^{3+}$

*New Journal of Chemistry*

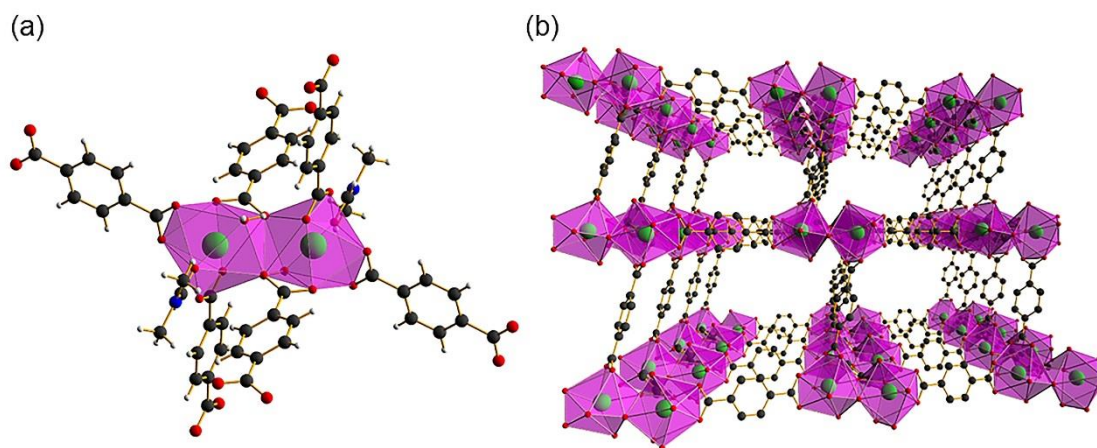

**Fig. S1** (a) Coordination environment and (b) projection along the *c* axis of the partially expanded net structure of the second phase in MLOF\_Eu9% sample. Polyhedra in violet represent lanthanide sites in networks.

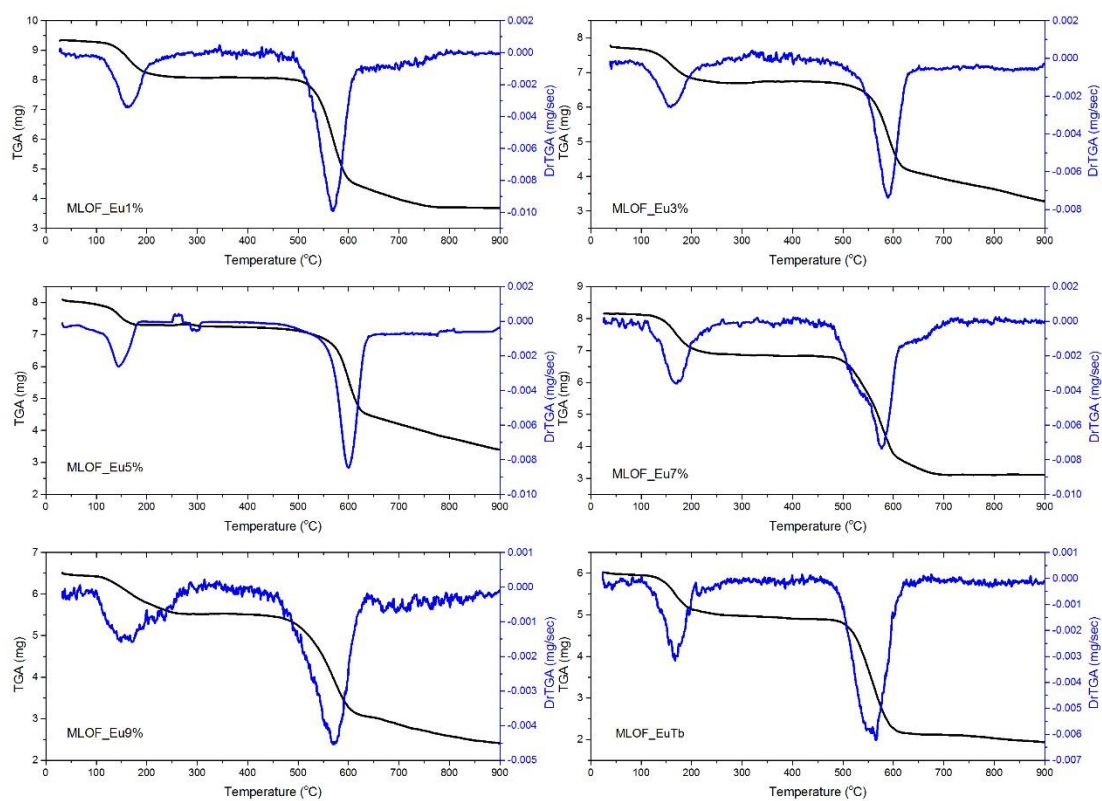

**Fig. S2** Thermogravimetric analysis of MLOF samples, from top to down, left column: MLOF\_Eu1%, MLOF\_Eu5%, MLOF\_Eu9%, and right column: MLOF\_Eu3%, MLOF\_Eu7%, MLOF\_EuTb.

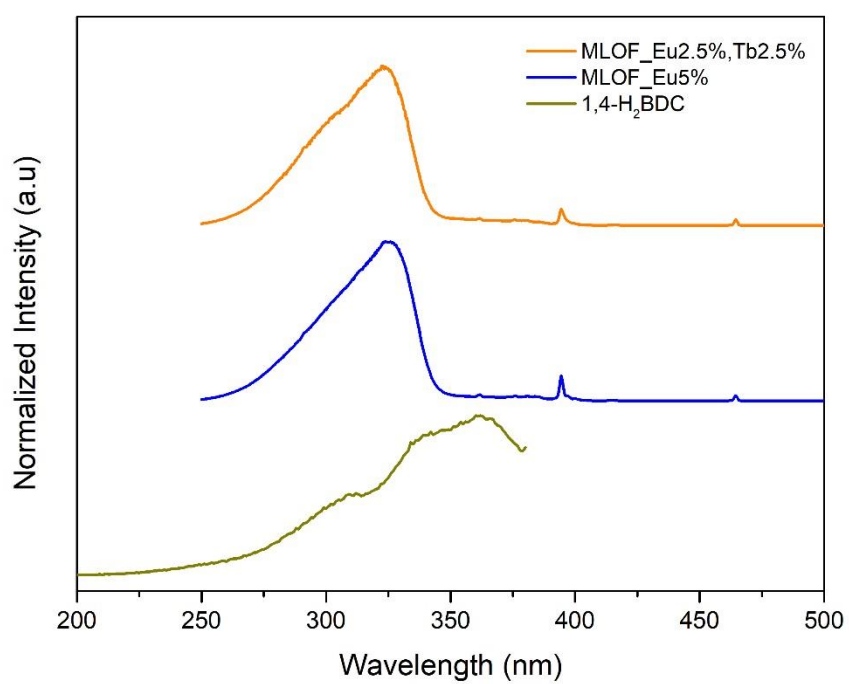

**Fig. S3** Excitation spectra of MLOF\_Eu5%, MLOF\_EuTb and pure 1,4-H<sub>2</sub>BDC ligand measured at room temperature.
